# Supplementary material for: PEGylated conjugated polyelectrolytes containing 2,1,3-benzoxadiazole units for targeted cell imaging
Source: Royal Society of Chemistry journal article supplement (doi:10.1039/c2py20113e), 2012-01-01
Supplement: c2py20113e.pdf [file c2py20113e.pdf]

## *Electronic Supplementary Information*

# PEGylated Conjugated Polyelectrolytes Containing 2,1,3-Benzoxadiazole Units for Targeted Cell Imaging

Jie Liu, Dan Ding, Junlong Geng, and Bin Liu\*

Department of Chemical and Biomolecular Engineering, 4 Engineering Drive 4, National University of  
Singapore, Singapore 117576, Singapore.

### Table of Contents

#### Calculation of CPE concentration.

**Fig. S1** Hydrodynamic radius distribution of PFBD-PEG<sub>2000</sub>-RGD NPs in water.

**Fig. S2** UV-vis and PL spectra of PFBD-PEG<sub>2000</sub>-RGD in water.

**Fig. S3** 3D CLSM images of HT-29 colon cancer cells after incubation with PFBD-PEG<sub>2000</sub>-COOH NPs (A) and PFBD-PEG<sub>2000</sub>-RGD NPs (B) at 37 °C for 2 h. The NP concentration is 0.25 μM based on repeat unit.

**Calculation of CPE concentration.** The CPE concentration is calculated based on the average molecular weight of repeat unit. As the PEG chains are randomly attached to the conjugated backbone, one repeat unit contains one fluorene moiety, one 2,1,3-benzoxadiazole moiety and relevant content of PEG chains. The average molecular weight of repeat unit ( $M_{RU}$ ) can be calculated from the following equation:

$$M_{RU} = M_F + M_{BD} + 2 \times M_{PEG} \times GE_{PEG}$$

Where,  $M_F$ ,  $M_{BD}$  and  $M_{PEG}$  are the molecular weight of fluorene moiety, 2,1,3-benzoxadiazole moiety and PEG chains, respectively.  $GE_{PEG}$  denotes the PEG-graft efficiency.  $M_{RU}$ s are calculated to be 1528 and 3652 g/mol for PFBD-PEG<sub>600</sub>-COOH and PFBD-PEG<sub>2000</sub>-COOH, respectively.

According to the average molecular weight of repeat unit, the concentration of CPEs can be calculated from the following equation:

$$[CPE] = m / (V \times M_{RU})$$

Where, the [CPE] is the concentration of CPEs, m is the amount of CPEs, and V is the volume the solution.

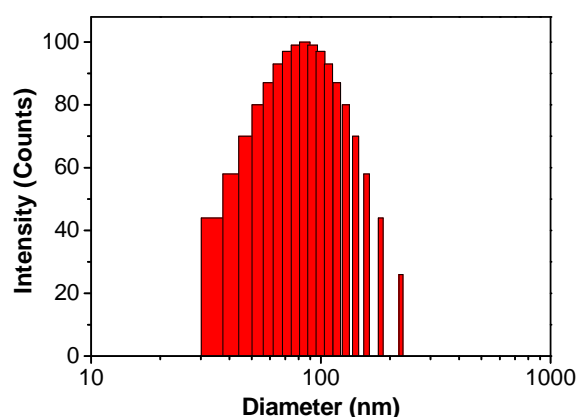

**Figure S1.** Hydrodynamic radius distribution of PFBD-PEG<sub>2000</sub>-RGD NPs in water.

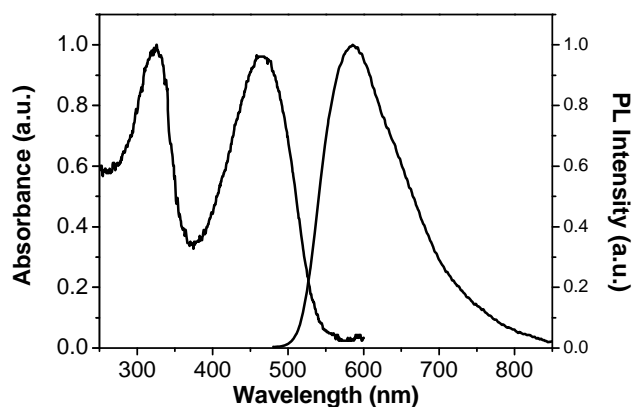

**Figure S2.** UV-vis and PL spectra of PFBD-PEG<sub>2000</sub>-RGD in water.

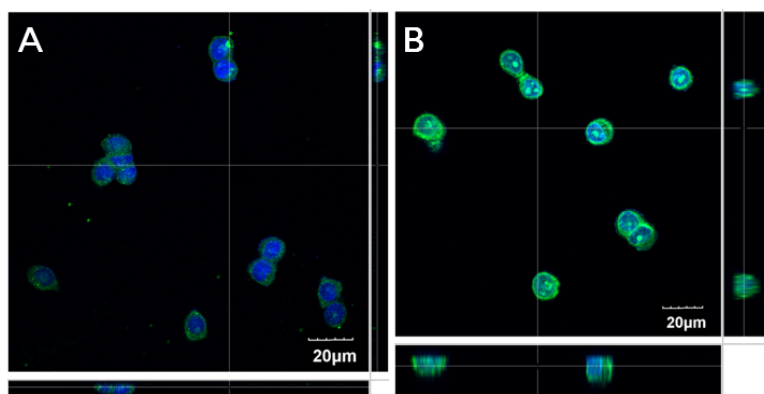

**Figure S3.** 3D CLSM images of HT-29 colon cancer cells after incubation with PFBD-PEG<sub>2000</sub>-COOH NPs (A) and PFBD-PEG<sub>2000</sub>-RGD NPs (B) at 37 °C for 2 h. The NP concentration is 0.25 μM based on repeat unit.
